# Supplementary material for: Pt–Carbon interaction-determined reaction pathway and selectivity for hydrogenation of 5-hydroxymethylfurfural over carbon supported Pt catalysts
Source: Royal Society of Chemistry journal article supplement (doi:10.1039/d0cy01920h), 2020-12-10
Supplement: d0cy01920h1.pdf [file d0cy01920h1.pdf]

## Electronic Supplementary Information

### **Pt-carbon interactions-determined reaction pathway and selectivity for hydrogenation of 5-hydroxymethylfurfural over carbon supported Pt catalysts**

Xiaofeng Wang,<sup>a,\*</sup> Chengcheng Zhang,<sup>a</sup> Baitang Jin,<sup>b</sup> Xinhua Liang,<sup>b</sup> Qingfa Wang,<sup>c</sup> Zhe Zhao,<sup>a</sup>  
Qingbo Li<sup>a</sup>

<sup>a</sup> College of Environmental Science and Engineering, Dalian Maritime University, Dalian 116026, China

<sup>b</sup> Department of Chemical and Biochemical Engineering, Missouri University of Science and Technology, Rolla, MO 65409, United States

<sup>c</sup> Key Laboratory of Green Chemical Technology of Ministry of Education, School of Chemical Engineering and Technology, Tianjin University, Tianjin 300072, China

\* Corresponding author, email: Xiaofeng Wang, wangxf@dlnu.edu.cn

#### **Experimental details**

**Catalyst preparation by ALD.** Platinum (Pt) nanoparticles (NPs) were deposited by ALD using (methylcyclopentadienyl)trimethyl platinum [(MeCp)PtMe<sub>3</sub>] as the Pt precursor and oxygen (O<sub>2</sub>) as the other reactant at 300 °C in a fluidized bed reactor (Figure S1), as described previously [1, 2]. In a typical run, 3 g of substrates were loaded into the reactor. Before the reaction, the substrates were degassed at 300 °C for 4 hr. During the ALD process, solid (MeCp)PtMe<sub>3</sub> (0.3 g) was heated and maintained at 70 °C, and carried by nitrogen (N<sub>2</sub>) to enter the reactor. (MeCp)PtMe<sub>3</sub> and O<sub>2</sub> were fed separately into the reactor. The particle substrates were fully fluidized with a gas flow rate controlled by mass flow controllers. The reactor was also subjected to vibration via vibrators to improve the quality of particle fluidization during the ALD process [3]. N<sub>2</sub> was used as a flush

gas to remove unreacted precursors and any byproducts during the reaction. A typical Pt ALD cycle included the following steps: (MeCp)PtMe<sub>3</sub> dose (300 s), N<sub>2</sub> purge (600 s), evacuation (10 s); O<sub>2</sub> dose (600 s), N<sub>2</sub> purge (600 s), evacuation (10 s).

Ni ALD was carried out following the similar procedures using bis(cyclopentadienyl)nickel (NiCp<sub>2</sub>) and hydrogen (H<sub>2</sub>) as precursors at 300 °C. The solid NiCp<sub>2</sub> was loaded in a heated bubbler and carried by N<sub>2</sub>. A typical Ni ALD cycle included the following steps: NiCp<sub>2</sub> dose (600 s), N<sub>2</sub> purge (900 s), evacuation (10 s); H<sub>2</sub> dose (900 s), N<sub>2</sub> purge (900 s), evacuation (10 s).

**N<sub>2</sub> adsorption-desorption measurements.** Nitrogen adsorption and desorption isotherms of substrates and catalysts were obtained at -196 °C. The surface area and the total pore volume of the samples were calculated using the Brunauer-Emmett-Teller (BET) method in a relative pressure range of 0.05-0.25 and the adsorption quantity at a relative pressure of P/P<sub>0</sub> = 0.99, respectively. The pore size distributions were derived from the desorption branches of the isotherms using the Barrett-Joyner-Halenda (BJH) method.

**High-resolution transmission electron microscopy (HRTEM).** The supported Pt NPs were visualized with a FEI Tecnai F20 field emission gun high-resolution TEM. Samples were directly supported on holey-carbon Cu grids. At least 100 NPs on supports were measured to get an average Pt particle size. STEM and EDS analysis were used to verify the PtNi bimetallic nanoparticles.

**X-ray powder diffraction (XRD).** The crystal structure of Pt catalysts was detected by XRD with filtered Cu K $\alpha$  radiation ( $\lambda = 1.5406 \text{ \AA}$ ). The scanning range was  $2\theta$  from 10° to 90°, with a scanning rate of 0.025 °/s.

**X-ray photoelectron spectroscopy (XPS).** XPS spectra of Pt catalysts were recorded with a Kratos Axis 165 X-ray photoelectron spectrometer using a monochromatic Al K $\alpha$  radiation ( $h\nu = 1486.6 \text{ eV}$ ), at a take-off angle of 0°. The survey scan spectra and Pt 4f core level spectra were recorded at a pass energy of 160 eV and 20 eV, respectively. The binding energy value was corrected by C 1s signal of 288.2 eV for the Pt/g-C<sub>3</sub>N<sub>4</sub>-IM catalyst, and that for all other catalysts were corrected by C 1s signal of 284.5 eV.

**H<sub>2</sub> temperature programmed reduction (H<sub>2</sub>-TPR) analysis.** The reduction properties of the supported Pt catalysts were analyzed by H<sub>2</sub>-TPR. The reaction temperature was programmed to rise at a heating rate of 10 °C/min up to 800 °C and the flow rate was 20 mL/min of 10 mol% H<sub>2</sub>/Ar gas. The consumption amount of H<sub>2</sub> during the H<sub>2</sub>-TPR was analyzed and measured by a thermal conductivity detector (TCD, Micromeritics Autochem II 2920).

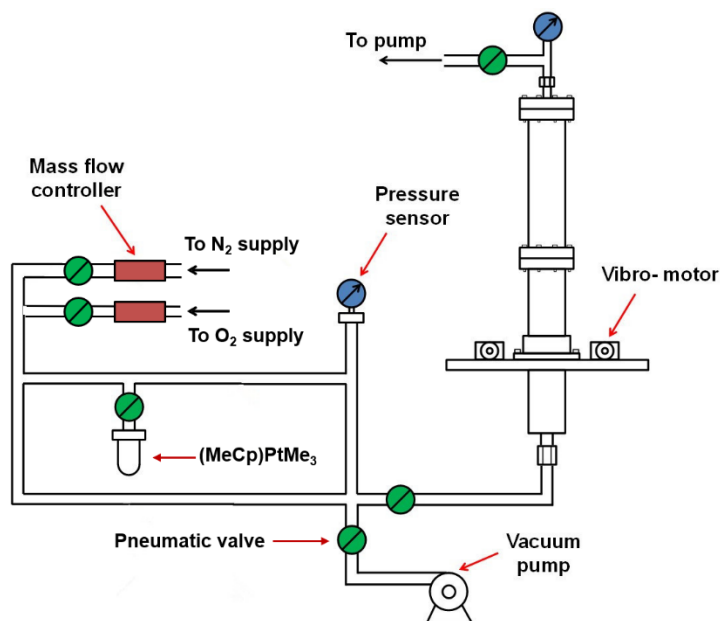

**Figure S1.** Scheme of atomic layer deposition reactor for Pt ALD.

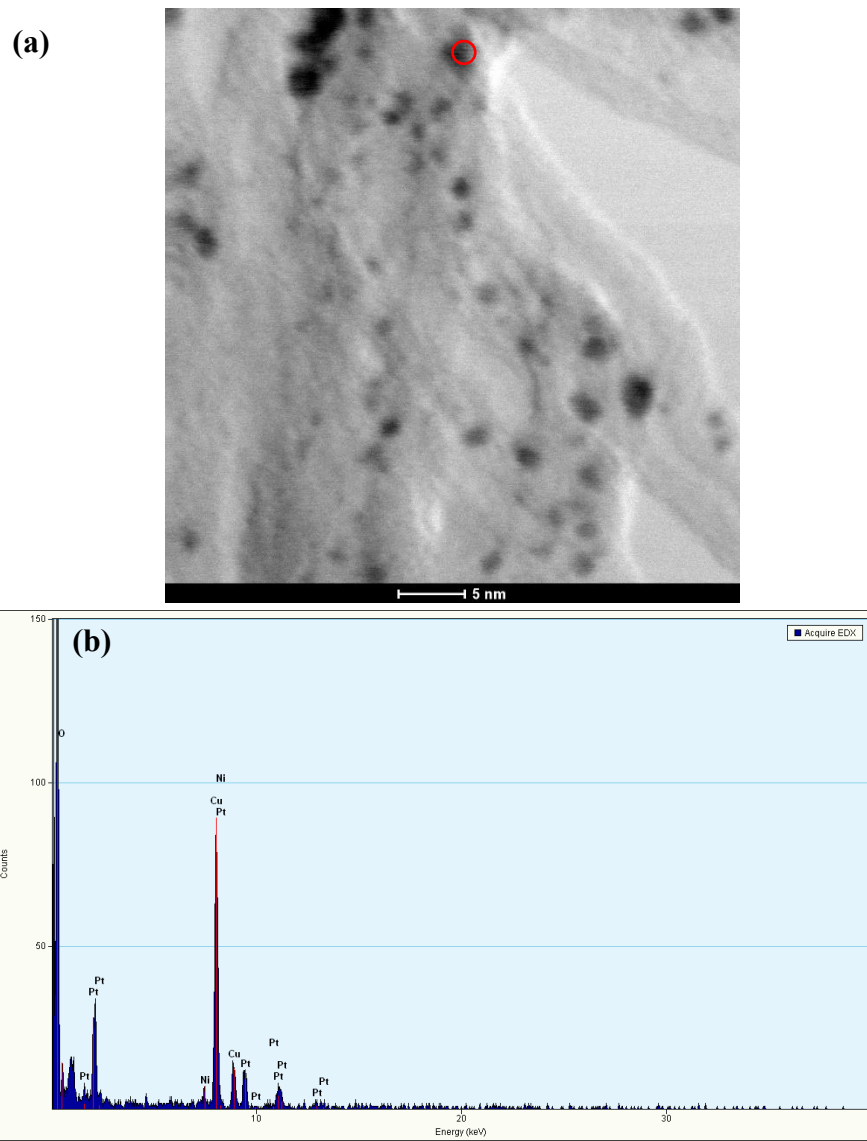

**Figure S2.** (a) STEM image of PtNi/CNTs-ALD and (b) EDS analysis of a selected nanoparticle (the labeled point).

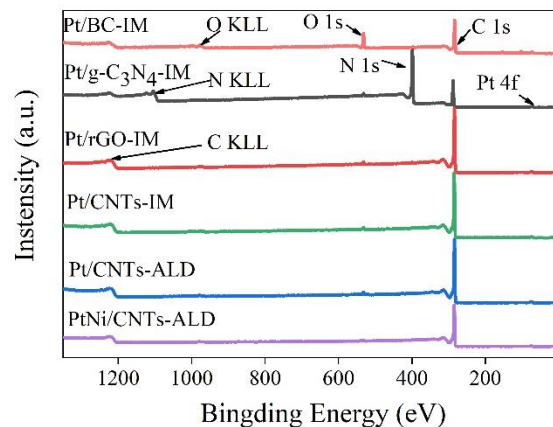

**Figure S3.** XPS spectra of survey scan for the Pt-based catalysts.

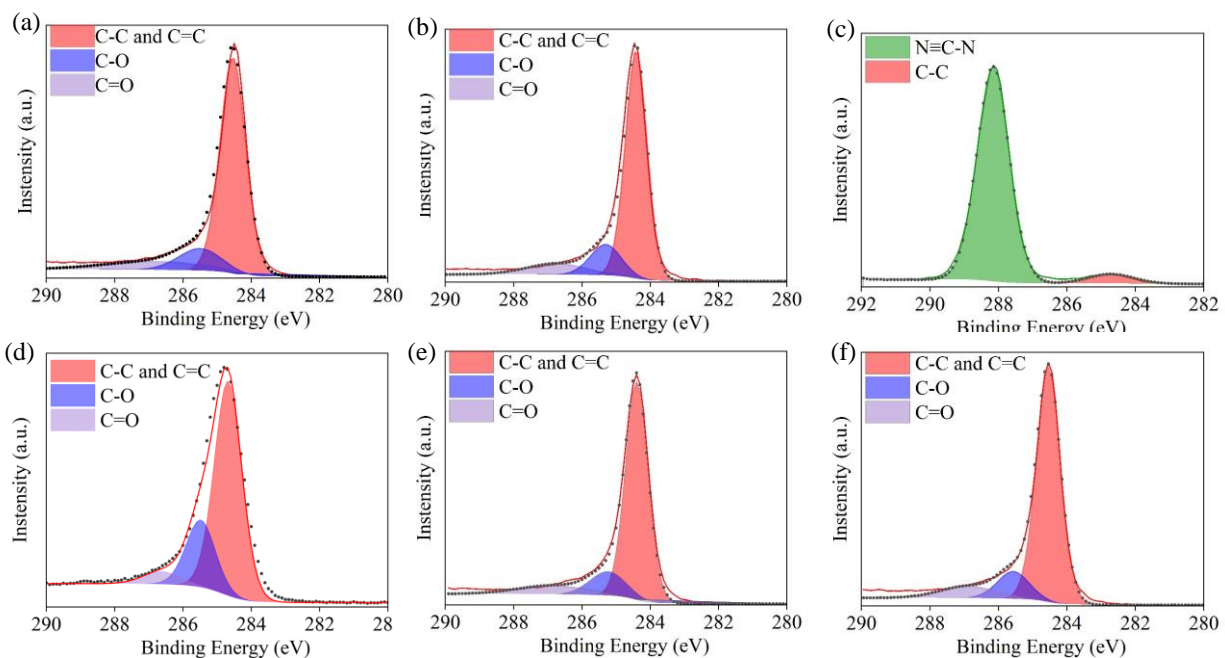

**Figure S4.** XPS spectra of C 1s for different Pt catalysts: (a) Pt/CNTs-IM, (b) Pt/rGO-IM, (c) Pt/g-C<sub>3</sub>N<sub>4</sub>-IM, (d) Pt/BC-IM, (e) Pt/CNTs-ALD and (f) PtNi/CNTs-ALD.

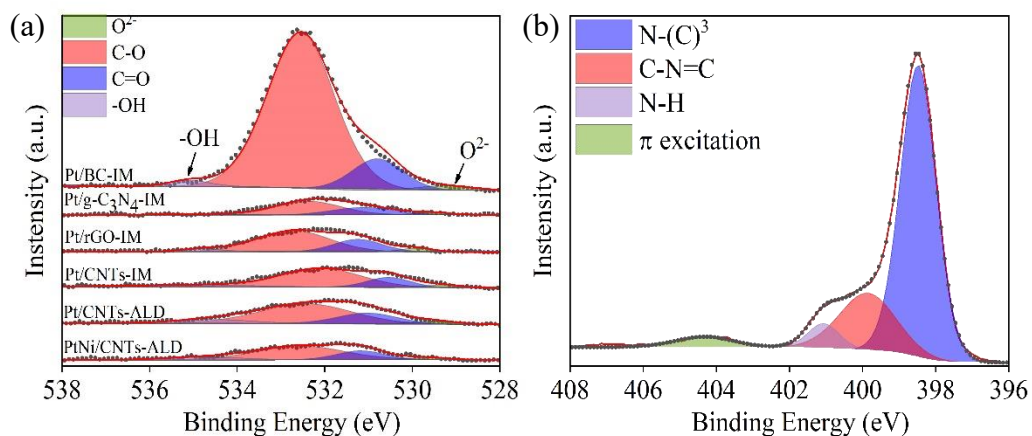

**Figure S5.** XPS spectra of (a) O 1s for the Pt/CNTs-IM, Pt/rGO-IM, Pt/g-C<sub>3</sub>N<sub>4</sub>-IM, Pt/BC-IM, Pt/CNTs-ALD and PtNi/CNTs-ALD catalysts and (b) N 1s for the Pt/g-C<sub>3</sub>N<sub>4</sub> catalyst.

**Table S1.** Ratios of Pt species and oxygen groups analyzed by XPS.

|                                        | Pt <sup>0</sup> /Pt <sup>II</sup> | C-C&C=C/C=O/C-O   |
|----------------------------------------|-----------------------------------|-------------------|
| Pt/CNTs-IM                             | 74/26                             | 75/12/13          |
| Pt/rGO-IM                              | 73/27                             | 75/10/15          |
| Pt/g-C <sub>3</sub> N <sub>4</sub> -IM | 76/24                             | 93/7 <sup>a</sup> |
| Pt/BC-IM                               | 75/25                             | 71/21/8           |
| Pt/CNTs-ALD                            | 79/21                             | 78/12/10          |
| PtNi/CNTs-ALD                          | 71/29                             | 76/14/10          |

<sup>a</sup> Ratio of N=C-N to C-C for the Pt/g-C<sub>3</sub>N<sub>4</sub>-IM catalyst.

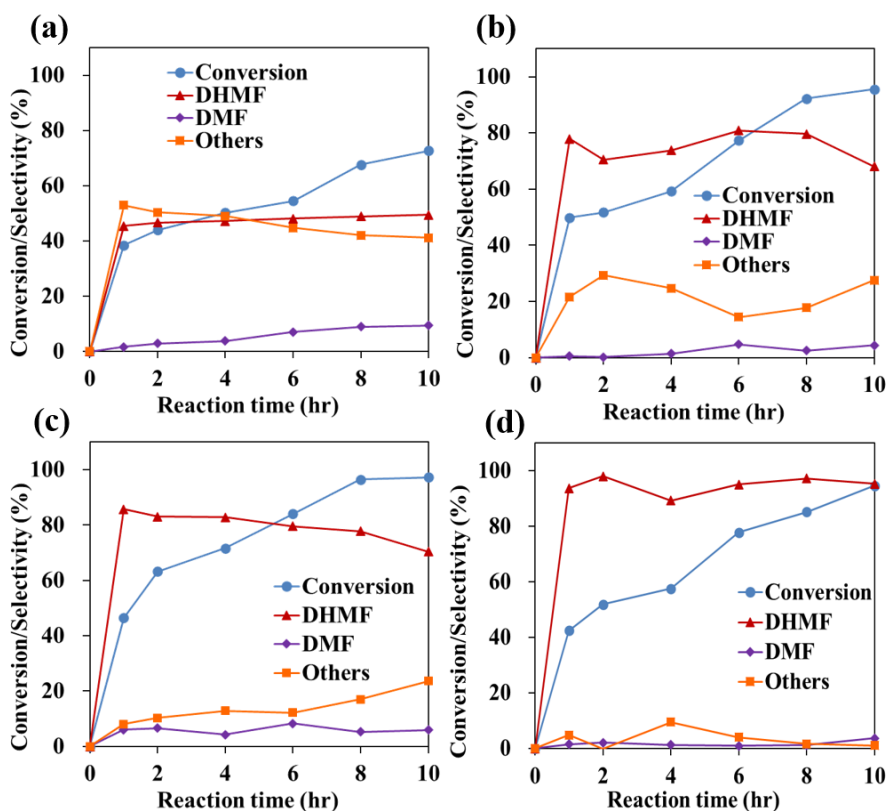

**Figure S6.** Conversion of HMF and selectivity to products versus reaction time for (a) Pt/CNTs-IM, (b) Pt/rGO-IM, (c) Pt/g-C<sub>3</sub>N<sub>4</sub>-IM, and (d) Pt/BC-IM catalysts. Reaction conditions: 0.5 g HMF, 0.1 g n-Tridecane, 40 mL 1-butanol, 50 mg catalyst, 160 °C, 10 bar H<sub>2</sub>, and 500 rpm.

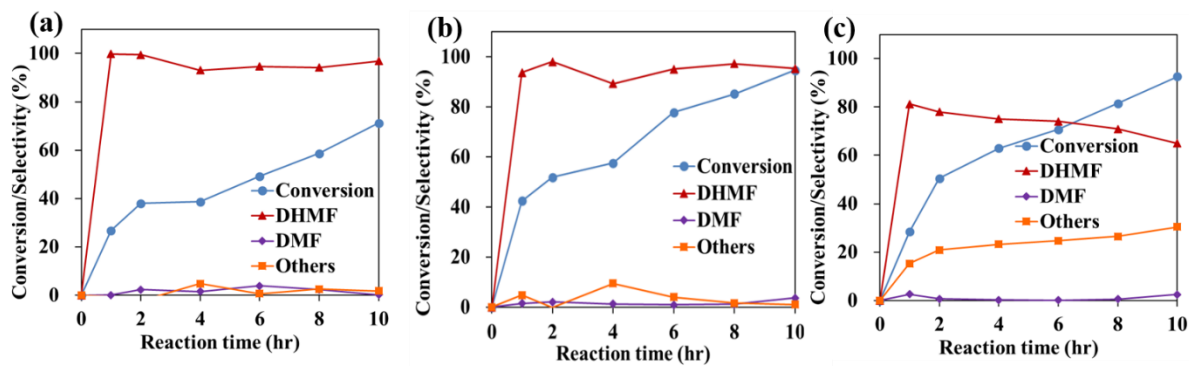

**Figure S7.** Effects of reaction temperature on the conversion of HMF and selectivity to products: (a) 140 °C, (b) 160 °C, and (c) 180 °C. Reaction conditions: 0.5 g HMF, 0.05 g n-Tridecane, 40 mL 1-butanol, 50 mg Pt/BC-IM catalyst, 10 bar H<sub>2</sub>, and 500 rpm.

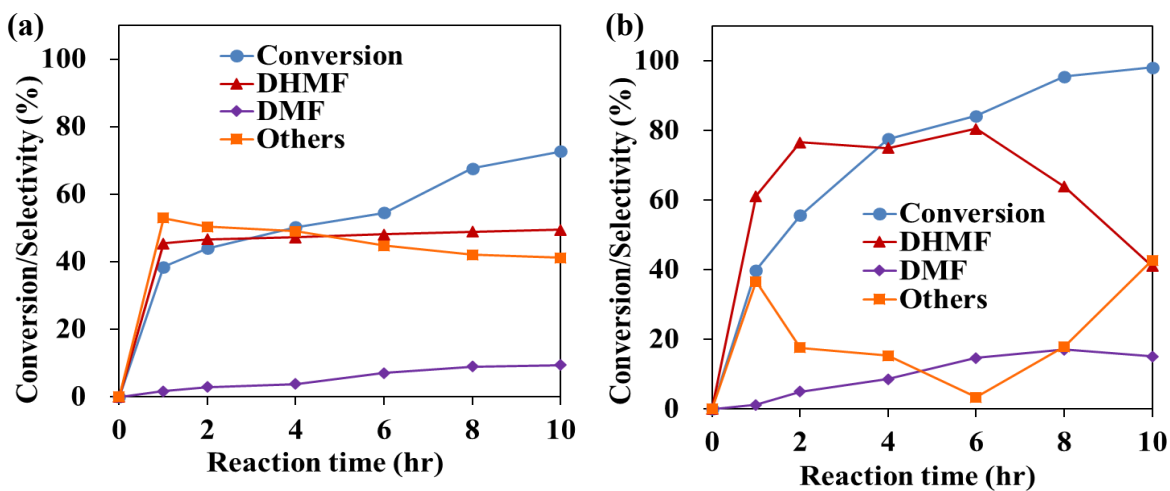

**Figure S8.** Effects of reaction temperature on the conversion of HMF and selectivity to products: (a) 160 °C and (b) 180 °C. Reaction conditions: 0.5 g HMF, 0.05 g n-Tridecane, 40 mL 1-butanol, 50 mg Pt/CNTs-IM catalyst, 10 bar H<sub>2</sub>, and 500 rpm.



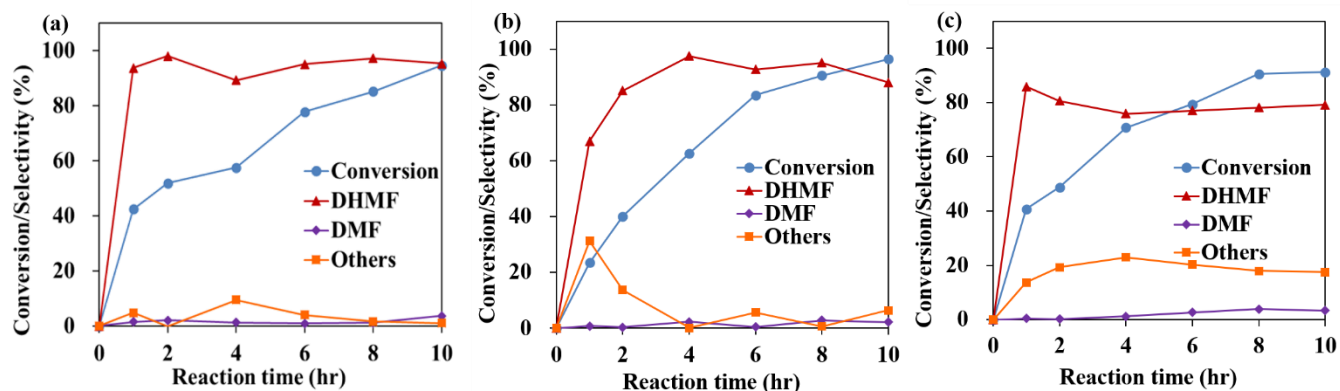

**Figure S9.** Effects of H<sub>2</sub> pressure on the conversion of HMF and selectivity to products: Pt/BC-IM catalyst at (a) 10 bar H<sub>2</sub>, (b) 20 bar H<sub>2</sub> and (c) 30 bar H<sub>2</sub>. Reaction conditions: 0.5 g HMF, 0.1 g n-Tridecane, 40 mL 1-butanol, 50 mg catalyst, 160 °C, and 500 rpm.

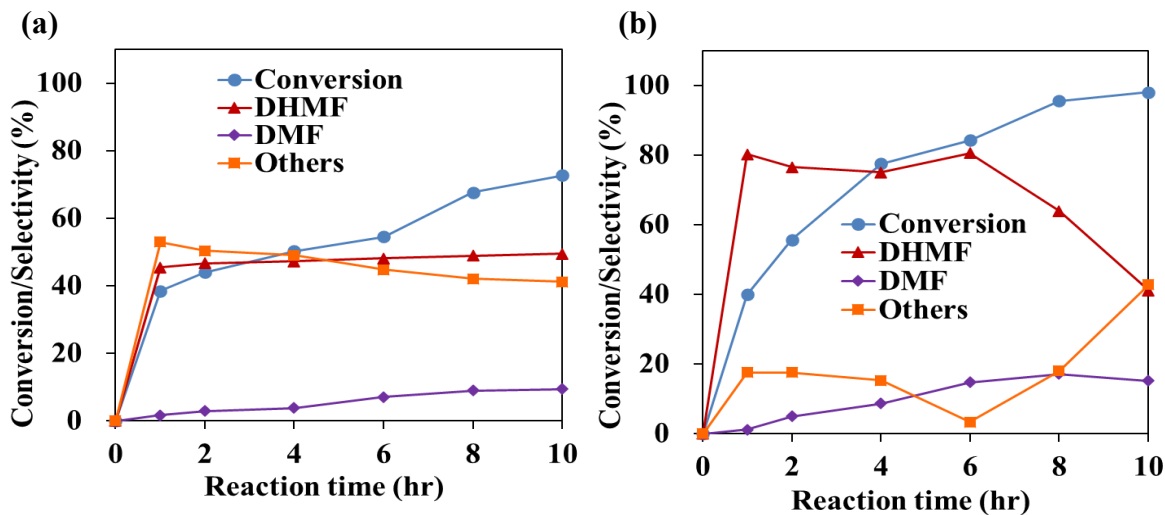

**Figure S10.** Effects of H<sub>2</sub> pressure on the conversion of HMF and selectivity to products: Pt/CNTs-IM catalyst at (a) 10 bar H<sub>2</sub> and (b) 30 bar H<sub>2</sub>. Reaction conditions: 0.5 g HMF, 0.1 g n-Tridecane, 40 mL 1-butanol, 50 mg catalyst, 160 °C, and 500 rpm.

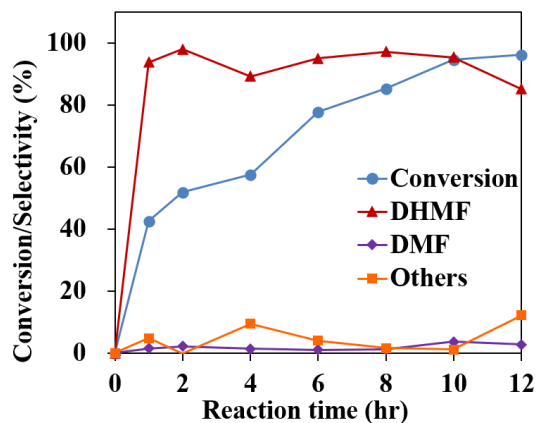

**Figure S11.** HMF conversion, selectivity to products over Pt/BC-IM catalyst. Reaction conditions: 0.5 g HMF, 0.05 g n-Tridecane, 40 mL 1-butanol, 50 mg catalyst, 160 °C, 10 bar H<sub>2</sub>, and 500 rpm.

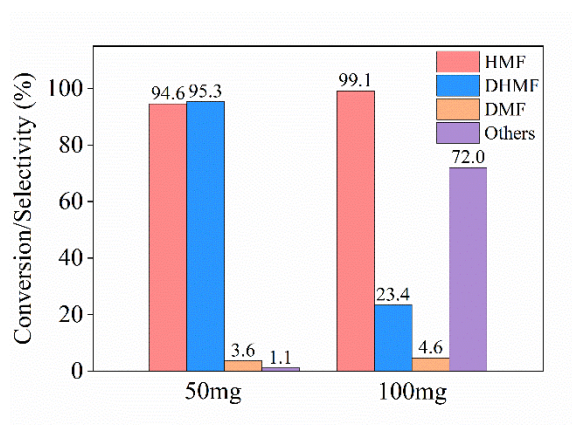

**Figure S12.** Effects of catalyst amount on the conversion of HMF and selectivity to products. Reaction conditions: 0.5 g HMF, 0.05 g n-Tridecane, 50/100 mg Pt/BC-IM catalyst, 40 mL 1-butanol, 10 bar H<sub>2</sub>, 160°C, and 500 rpm.

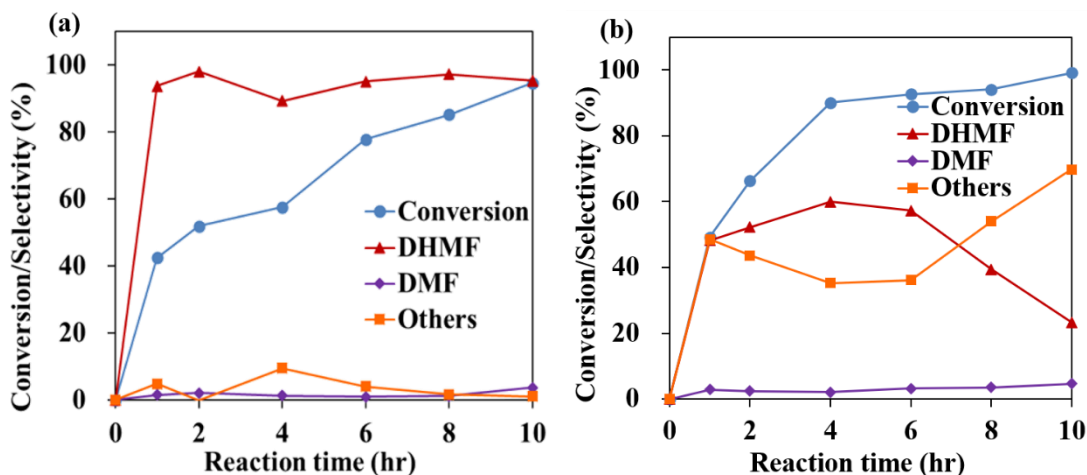

**Figure S13.** Conversion of HMF and selectivity to products versus reaction time: (a) 50 mg, and (b) 100 mg of Pt/BC-IM catalyst. Reaction conditions: 0.5 g HMF, 0.1 g n-Tridecane, 40 mL 1-butanol, 10 bar H<sub>2</sub>, 160 °C, and 500 rpm.

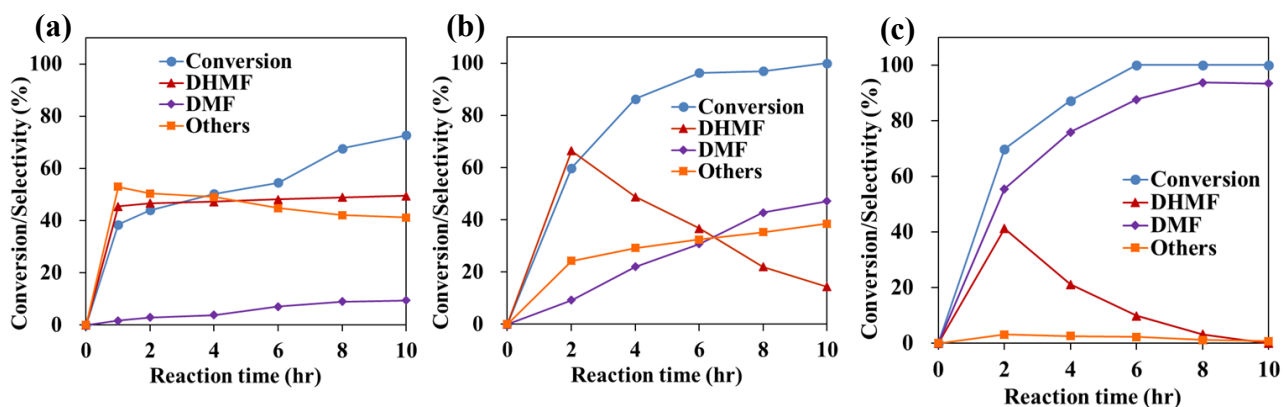

**Figure S14.** Conversion of HMF and selectivity to products versus reaction time for (a) Pt/CNTs-IM, (b) Pt/CNTs-ALD, and (c) PtNi/CNTs-ALD catalysts. Reaction conditions: 0.5 g HMF, 0.1 g n-Tridecane, 40 mL 1-butanol, 50 mg catalyst, 160 °C, 10 bar H<sub>2</sub>, and 500 rpm.

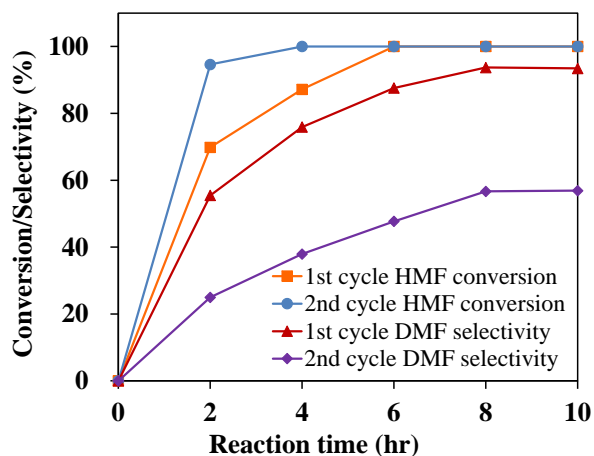

**Figure S15.** Conversion of HMF and selectivity to products in the cycling tests over PtNi/CNTs-ALD catalyst. Reaction conditions: 0.5 g HMF, 0.1 g n-Tridecane, 40 mL 1-butanol, 50 mg catalyst, 160 °C, 10 bar H<sub>2</sub>, and 500 rpm.

## References

- [1] Wang, Xiaofeng, Yufang He, Yuzi Liu, Jonghyun Park, and Xinhua Liang, Atomic layer deposited Pt-Co bimetallic catalysts for selective hydrogenation of  $\alpha$ ,  $\beta$ -unsaturated aldehydes to unsaturated alcohols. *Journal of Catalysis*, 2018. **366**: p. 61-69.
- [2] Wang, Xiaofeng, Yuzi Liu, and Xinhua Liang, Hydrogenolysis of 5-hydroxymethylfurfural to 2,5-dimethylfuran over supported Pt-Co bimetallic catalysts under mild conditions. *Green Chemistry*, 2018. **20**(12): p. 2894-2902.
- [3] Patel, Rajankumar L, Ying-Bing Jiang, and Xinhua Liang, Highly porous titania films coated on sub-micron particles with tunable thickness by molecular layer deposition in a fluidized bed reactor. *Ceramics International*, 2015. **41**(2): p. 2240-2246.
